# Supplementary material for: The Impact of Viral and Bacterial Co-Infections and Home Antibiotic Treatment in SARS-CoV-2 Hospitalized Patients at the Policlinico Tor Vergata Hospital, Rome, Italy
Source: MDPI journal article supplement (doi:10.3390/antibiotics12091348), 2023-08-22
Supplement: s1 [file s1]

**Table S1.** Characteristics of HBsAg positive patients.

| Pt | Age | Sex | Known | Previously treated | HBcAb    | HBsAb    | HBsAb quantitative (UI/ml) | HBeAg    | HBeAb    | HBsAg quantitative (UI/mL) | Viremia (UI/mL) | HDV serology | Treatment started | Outcome   |
|----|-----|-----|-------|--------------------|----------|----------|----------------------------|----------|----------|----------------------------|-----------------|--------------|-------------------|-----------|
| 1  | 43  | F   | NA    | no                 | positive | positive | 9.89                       | negative | positive | NA                         | <10             | negative     | no                | LTFU      |
| 2  | 74  | F   | yes   | no                 | positive | negative | 0                          | negative | positive | 2.30                       | <10             | negative     | entecavir         | Follow-up |
| 3  | 75  | M   | no    | no                 | positive | negative | 0.39                       | negative | positive | NA                         | NA              | NA           | no                | Death     |
| 4  | 63  | F   | no    | no                 | positive | negative | 4.13                       | negative | positive | 12.68                      | 671             | negative     | entecavir         | LTFU      |
| 5  | 69  | M   | no    | no                 | positive | negative | 0                          | negative | positive | 31391.40                   | 2380000         | negative     | tenofovir         | Follow-up |
| 6  | 68  | M   | no    | no                 | positive | negative | 0                          | negative | positive | NA                         | <10             | negative     | no                | LTFU      |

Pt: patients ID number; F: female; LTFU: lost at follow-up; M: male; NA: not available; HBcAb: Antibodies anti-hepatitis B core; HBsAb: antibodies anti-hepatitis S antigen; HBeAg: Hepatitis e antigen; HBeAb: antibodies anti-hepatitis e antigen; HBsAg: Hepatitis B surface antigen; HDV: Hepatitis D virus

**Table S2.** Characteristics of anti-HCV positive patients.

| Pt | Age | Sex | Known | Previously treated | Viremia (IU/mL) | Outcome      |
|----|-----|-----|-------|--------------------|-----------------|--------------|
| 1  | 56  | F   | no    | no                 | 18              | LTFU         |
| 2  | 59  | M   | yes   | no                 | negative        | LTFU         |
| 3  | 50  | M   | no    | no                 | 51              | LTFU         |
| 4  | 69  | F   | yes   | yes - 2010         | negative        | No follow-up |
| 5  | 78  | F   | yes   | no                 | 4330000         | LTFU         |
| 6  | 48  | F   | no    | no                 | negative        | LTFU         |
| 7  | 33  | M   | no    | no                 | 4430            | LTFU         |
| 8  | 60  | M   | no    | no                 | negative        | No follow-up |
| 9  | 62  | M   | yes   | yes - 2000         | NA              | LTFU         |
| 10 | 52  | M   | no    | no                 | NA              | LTFU         |

Pt: patients ID number; F: female; LTFU: lost at follow-up; M: male; NA: not available

**Table S3.** Characteristics of microbiological isolates from positive blood cultures.

|                                                 |                                                                                                                                                                                                                                                                    |
|-------------------------------------------------|--------------------------------------------------------------------------------------------------------------------------------------------------------------------------------------------------------------------------------------------------------------------|
| Blood cultures considered as contaminant        | 21 → 10 <i>Staphylococcus hominis</i> (47.6%)<br>6 <i>Staphylococcus epidermidis</i> (28.6%)<br>2 <i>Staphylococcus capitis</i> (9.5%)<br>1 <i>Staphylococcus warneri</i> (4.8%)<br>1 <i>Corynebacterium acnes</i> (4.8%)<br>1 <i>Enterococcus faecalis</i> (4.8%) |
| Blood cultures treated as bloodstream infection | 7 → 1 <i>Staphylococcus epidermidis</i><br>1 <i>Staphylococcus aureus</i><br>1 <i>Streptococcus suis</i><br>1 <i>Haemophilus influenzae</i><br>1 <i>Bacillus cereus</i><br>1 <i>Bacillus amyloliquefaciens</i><br>1 <i>Stenotrophomonas maltophilia</i>            |
